# Supplementary material
Source: PubMed Central journal article supplement (PMC4679685)

## Supplementary materials

Table S1. Empirical type I error of quantitative traits with  $t$  distribution error terms using different distance functions in microbiome genetic association.

| $\alpha$ | CI_lower | CI_upper | Kw_SKAT  | Kw_aSKAT        | Ku_SKAT  | Ku_aSKAT | KBC_SKAT | KBC_aSKAT |
|----------|----------|----------|----------|-----------------|----------|----------|----------|-----------|
| df = 1   |          |          |          |                 |          |          |          |           |
| 5.00E-02 | 4.86E-02 | 5.14E-02 | 2.84E-02 | <b>5.61E-02</b> | 4.07E-03 | 4.24E-02 | 9.34E-03 | 4.77E-02  |
| 1.00E-02 | 9.38E-03 | 1.06E-02 | 3.53E-03 | <b>1.16E-02</b> | 7.00E-05 | 6.78E-03 | 4.30E-04 | 8.13E-03  |
| 1.00E-03 | 8.04E-04 | 1.20E-03 | 2.30E-04 | 1.00E-03        | 0.00E+00 | 4.10E-04 | 0.00E+00 | 6.90E-04  |
| df = 5   |          |          |          |                 |          |          |          |           |
| 5.00E-02 | 4.86E-02 | 5.14E-02 | 2.59E-02 | 5.11E-02        | 6.44E-03 | 4.96E-02 | 1.15E-02 | 5.06E-02  |
| 1.00E-02 | 9.38E-03 | 1.06E-02 | 3.32E-03 | 1.03E-02        | 2.00E-04 | 1.02E-02 | 7.30E-04 | 1.01E-02  |
| 1.00E-03 | 8.04E-04 | 1.20E-03 | 1.60E-04 | 1.06E-03        | 0.00E+00 | 9.50E-04 | 1.00E-05 | 1.06E-03  |

The total sample size is 100,  $\alpha$  is the nominal significance level. CI\_lower and CI\_upper are the lower and upper endpoint of the 95% confidence interval assuming the true type I error is  $\alpha$  based on  $10^5$  replicates. Values in bold indicate type I errors above the upper endpoint of the confidence interval. The error term was simulated using the  $t$  distribution with 1 and 5 degrees of freedom (df). Kw denotes the kernel from the weighted phylogeny-based UniFrac distances, Ku denotes the kernel from the unweighted phylogeny-based UniFrac distances, and KBC denotes the kernel from the nonphylogeny-based Bray-Curtis distance. uSKAT does not use small sample adjustment for quantitative trait. aSKAT is the proposed adjusted SKAT.

Table S2. Empirical type I error of quantitative traits with non-linear covariates using different distance functions in microbiome genetic association.

| $\alpha$ | CI_lower | CI_upper | Kw_SKAT  | Kw_aSKAT | Ku_SKAT  | Ku_aSKAT | KBC_SKAT | KBC_aSKAT |
|----------|----------|----------|----------|----------|----------|----------|----------|-----------|
| 5.00E-02 | 4.86E-02 | 5.14E-02 | 2.57E-02 | 5.10E-02 | 6.26E-03 | 4.97E-02 | 1.19E-02 | 4.98E-02  |
| 1.00E-02 | 9.38E-03 | 1.06E-02 | 3.23E-03 | 1.00E-02 | 2.00E-04 | 9.51E-03 | 6.00E-04 | 1.02E-02  |
| 1.00E-03 | 8.04E-04 | 1.20E-03 | 1.80E-04 | 9.00E-04 | 1.00E-05 | 1.08E-03 | 0.00E+00 | 9.60E-04  |

The total sample size is 100,  $\alpha$  is the nominal significance level. CI\_lower and CI\_upper are the lower and upper endpoint of the 95% confidence interval assuming the true type I error is  $\alpha$  based on  $10^5$  replicates. The non-linear term was a squared covariate but not accounted for in the test. Kw denotes the kernel from the weighted phylogeny-based UniFrac distances, Ku denotes the kernel from the unweighted phylogeny-based UniFrac distances, and KBC denotes the kernel from the nonphylogeny-based Bray-Curtis distance. uSKAT does not use small sample adjustment for quantitative trait. aSKAT is the proposed adjusted SKAT.

Figure S1

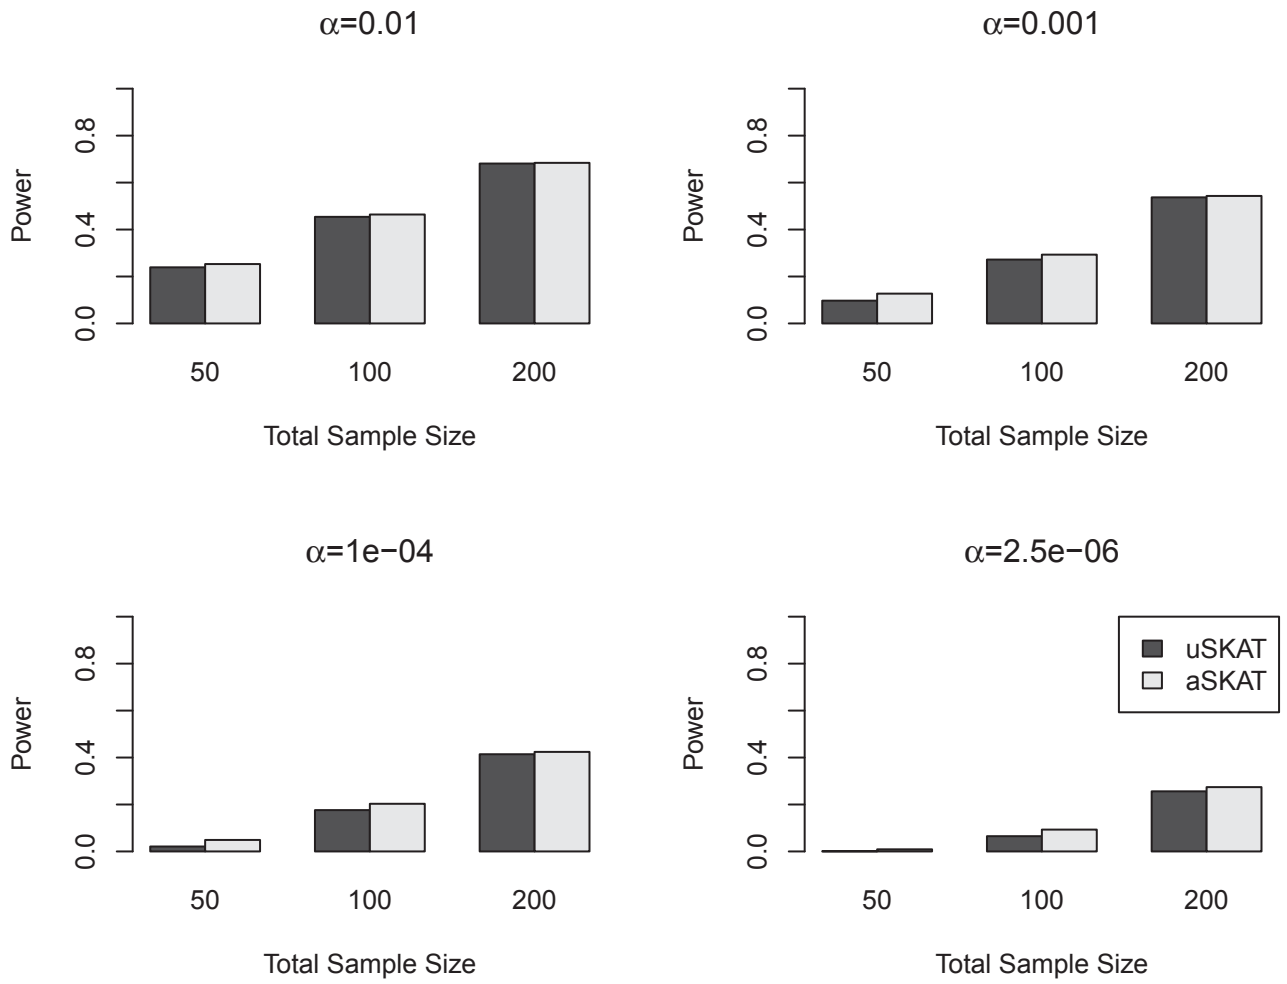

Figure S2

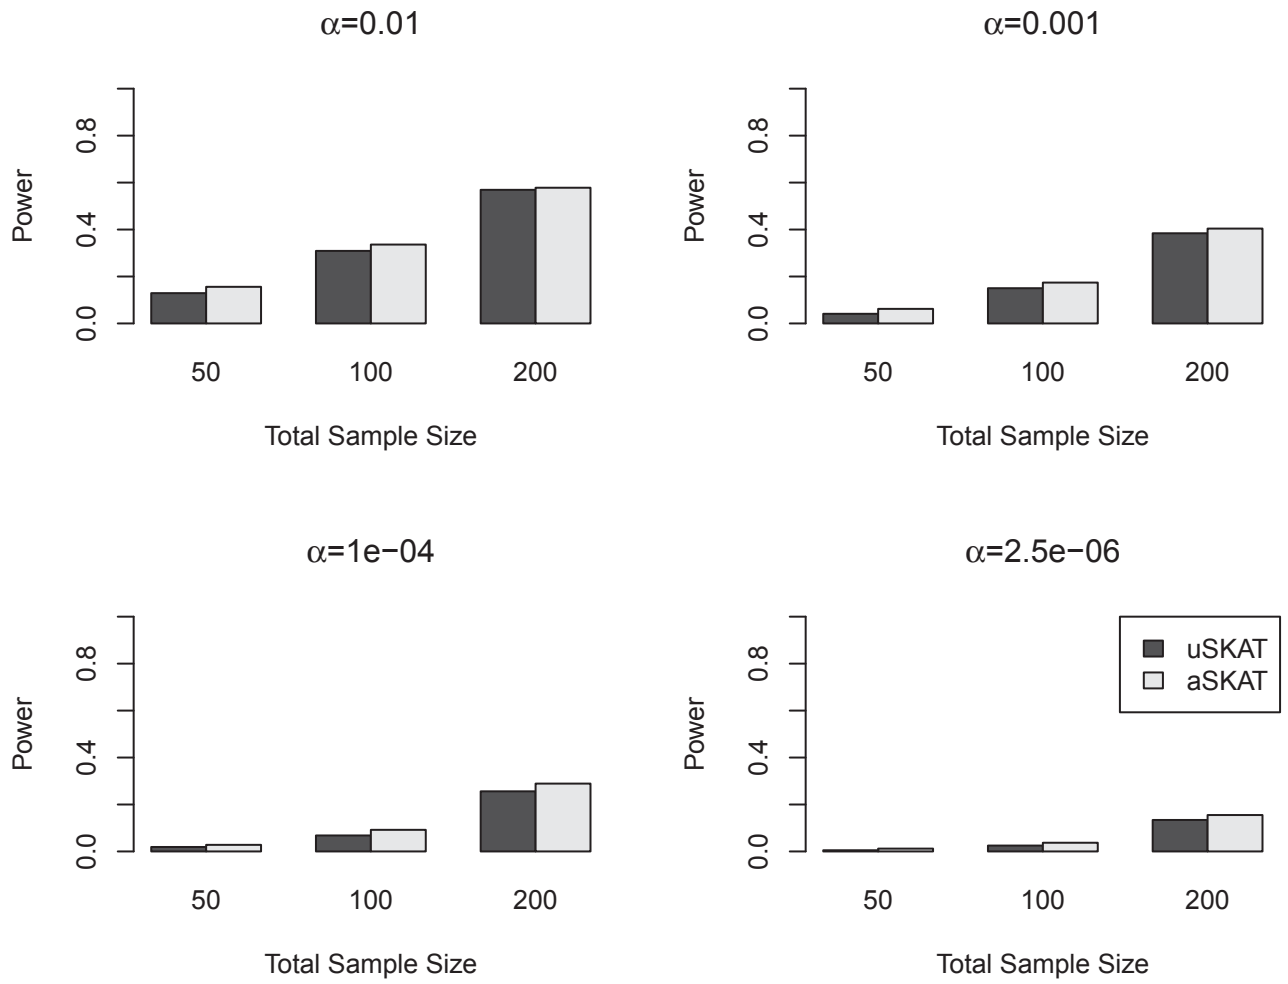

Figure S3

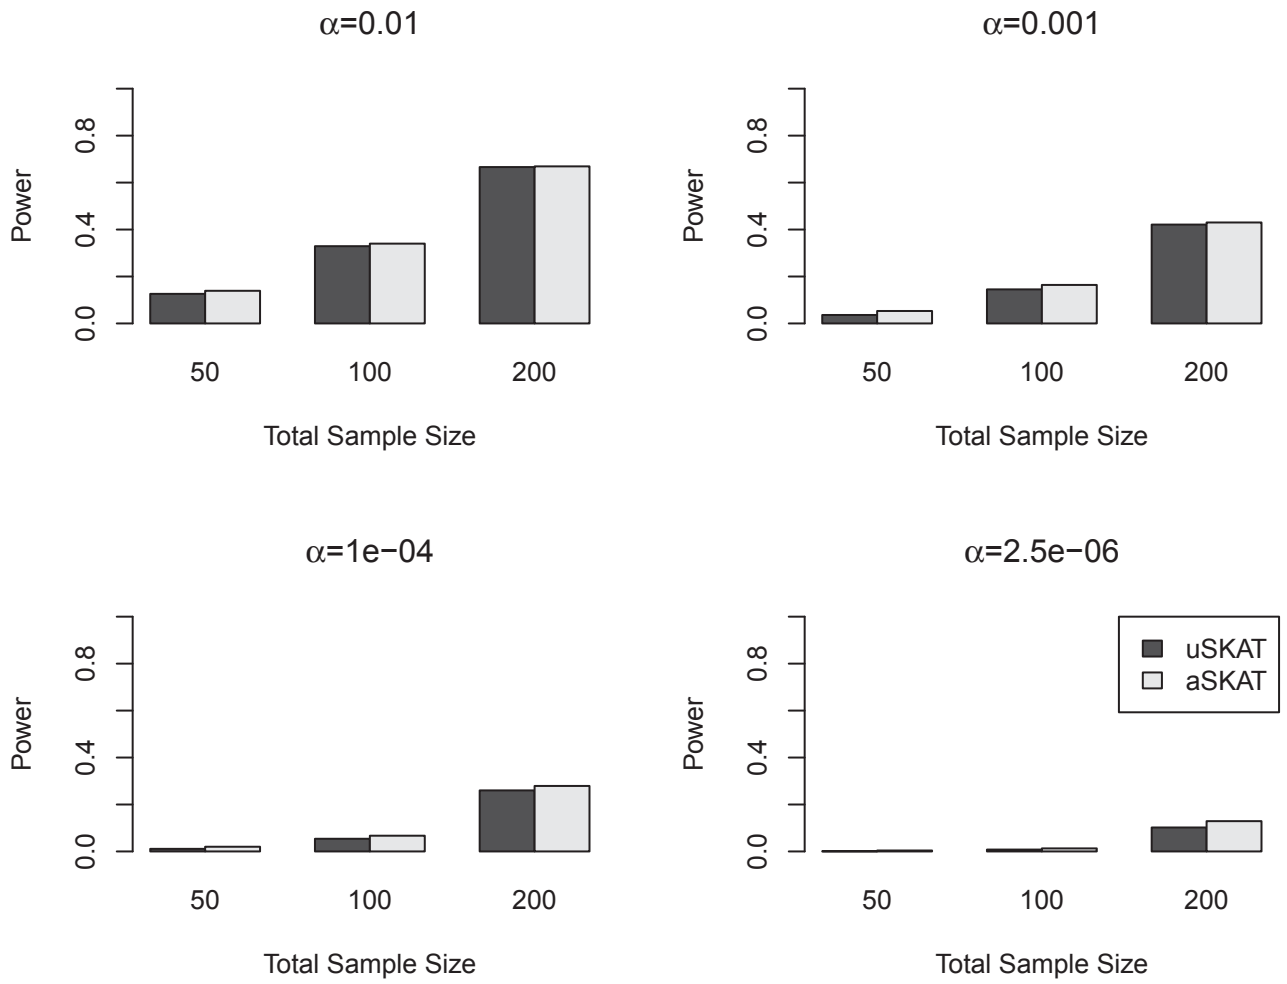

Figure S4

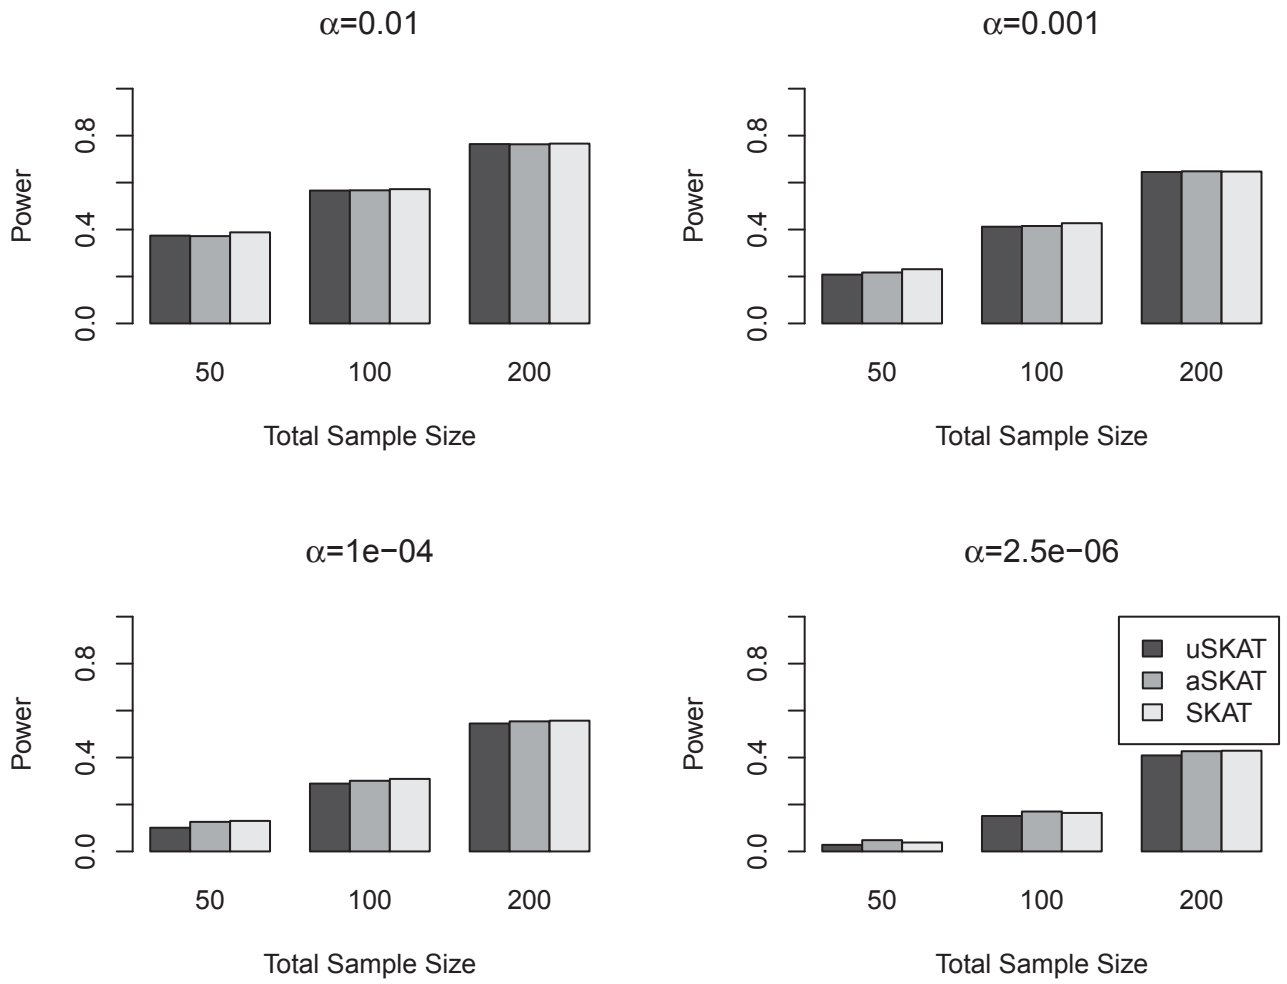

Figure S5

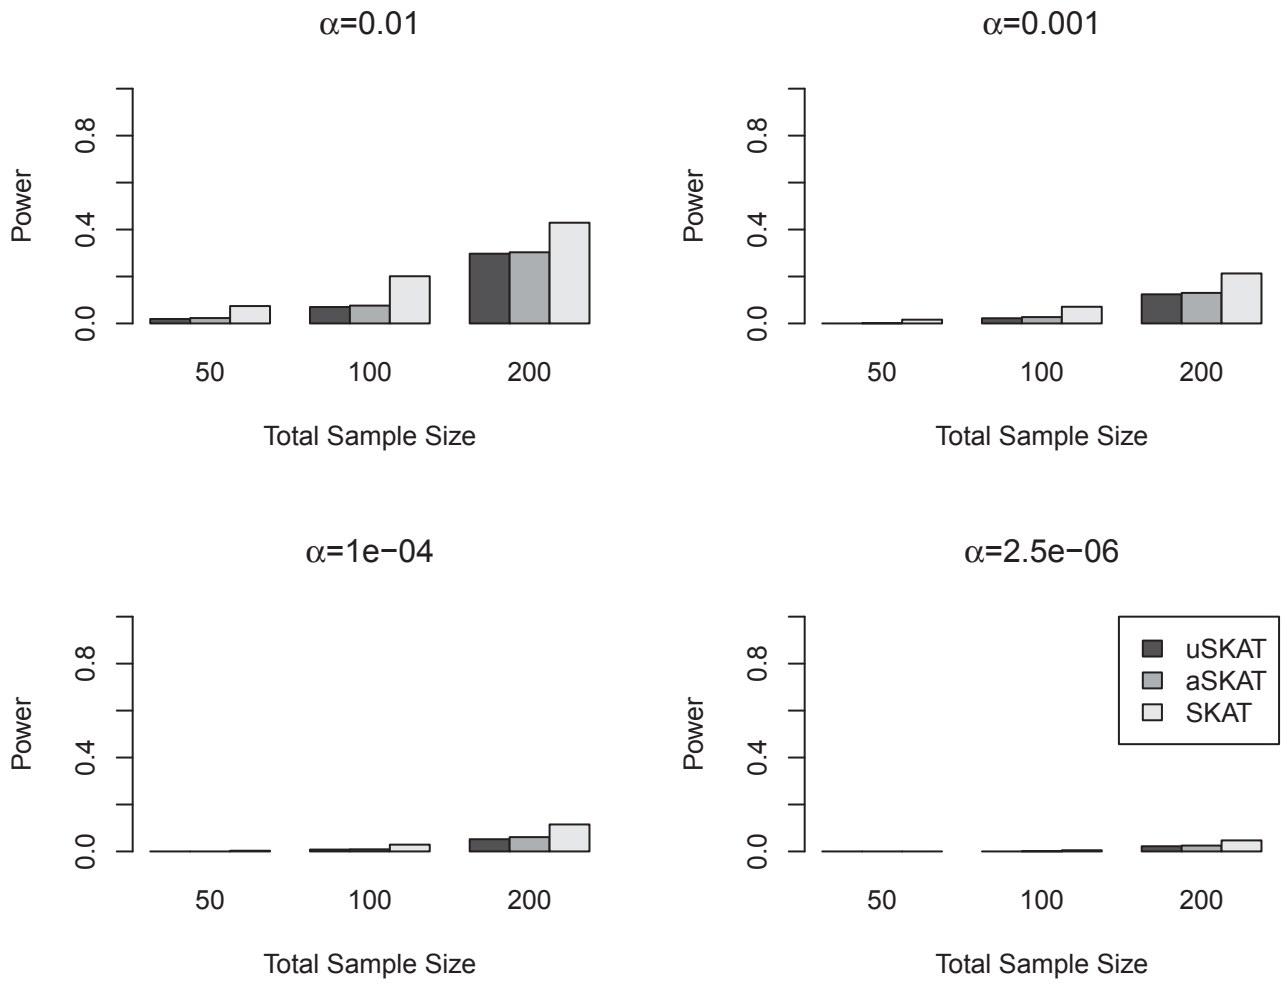

Figure S6

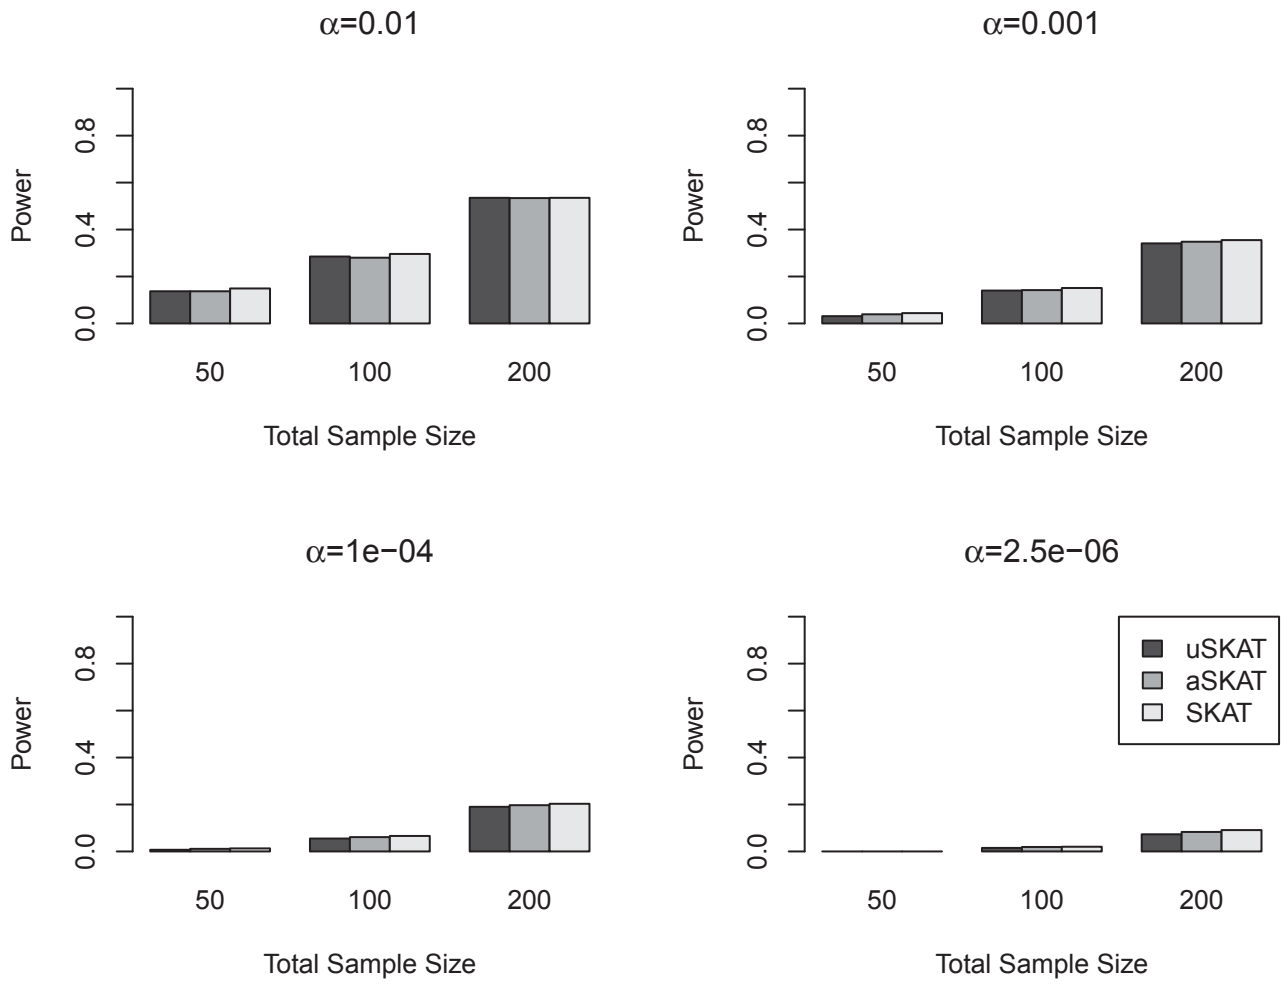



Figure S7

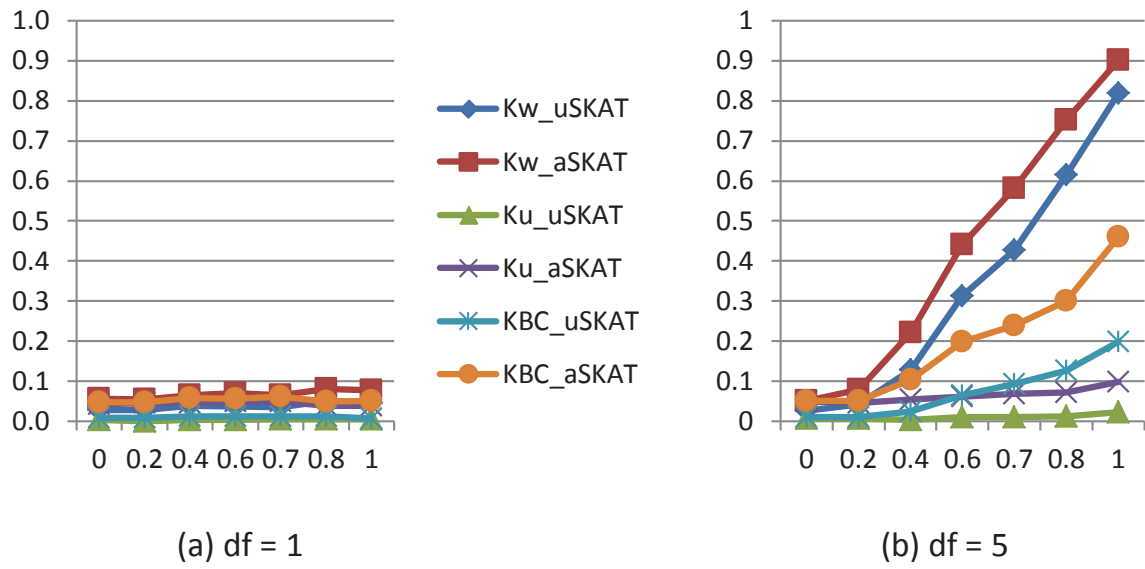

Figure S8

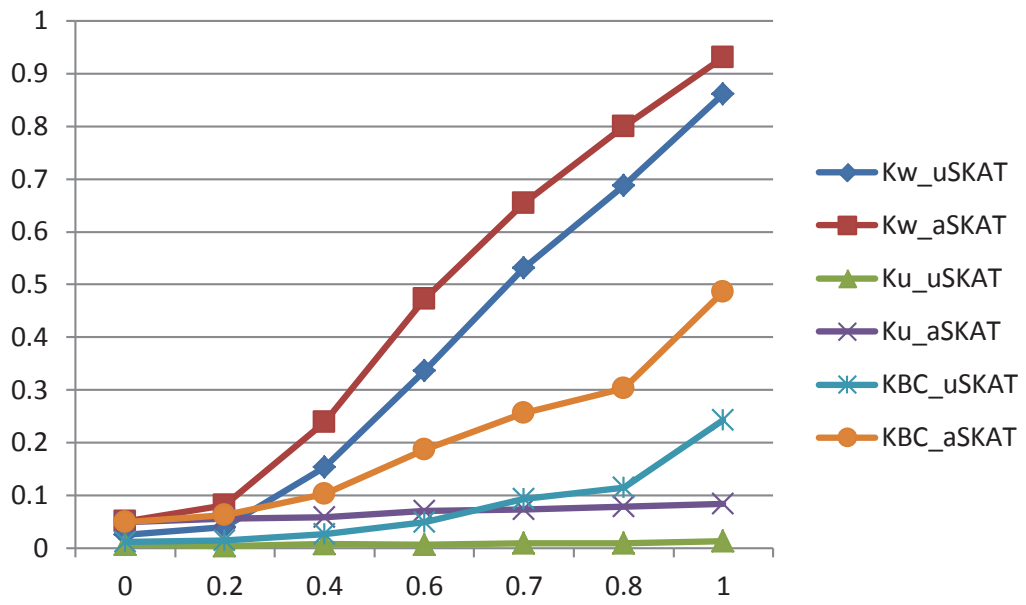

Figure S9

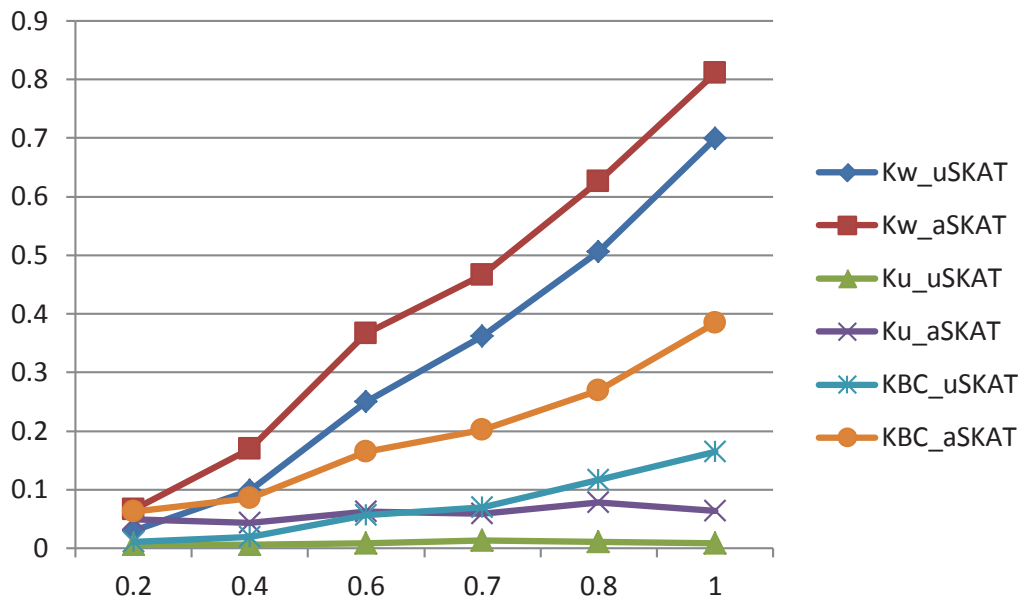

Supplement: NIHMS722556-supplement-Supp_TableS1-S2___FigureS1-S9.pdf [file NIHMS722556-supplement-Supp_TableS1-S2___FigureS1-S9.pdf]
